# Supplementary material for: Lactobacillus paracasei CBA L74 Metabolic Products and Fermented Milk for Infant Formula Have Anti-Inflammatory Activity on Dendritic Cells In Vitro and Protective Effects against Colitis and an Enteric Pathogen In Vivo
Source: PubMed Central journal article supplement (PMC3919712; doi:10.1371/journal.pone.0087615), 2014-02-10
Supplement: pone.0087615.s003.pdf [file pone.0087615.s003.pdf]

| <b>Gene</b>           | <b>Forward primer (5'-&gt;3')</b> | <b>Reverse primer (5'-&gt;3')</b> |
|-----------------------|-----------------------------------|-----------------------------------|
| <b>Rpl32 (Ralp32)</b> | AAGCGAAACTGGCGGAAAC               | TAACCGATGTTGGGCATCAG              |
| <b>Tbet</b>           | TCAACCAGCACCAGACAGAG              | CCACATCCACAAACATCCTG              |
| <b>Gata3</b>          | GATGTAAGTCGAGGCCCAAG              | AGGCATTGCAAAGGTAGTGC              |
| <b>Ifn-g</b>          | CACGGCACAGTCATTGAAAG              | GCTGATGGCCTGATTGTCTT              |
| <b>Il-17a</b>         | AAGAAGCAGCCATTGGAGAA              | TGCTACCTCCCTCAGAATGG              |
| <b>Il-6</b>           | CCATAGCTACCTGGAGTACATG            | TGGAAATTGGGGTAGGAAGGAC            |
| <b>Il33</b>           | CCCGCCTTGCAAATAAGA                | CTTATGGTGAGGCCAGAACG              |
| <b>Il-1b</b>          | GACCTTCCAGGATGAGGACA              | TCCATTGAGGTGGAGAGCTT              |
| <b>Cxcl1 (Kc)</b>     | GCTGGGATTCACCTCAAGAA              | TCTCCGTTACTTGGGGACAC              |
| <b>Ccl2</b>           | CACGTGTTGGCTCAGCCAGATGC           | CCTTCTTGGGGTCAGCACAGACC           |
| <b>Cox2</b>           | CCACTTCAAGGGAGTCTGGA              | AGTCATCTGCTACGGGAGGA              |
| <b>Nos2 (iNos)</b>    | TCTCAAACCTGCTCTGAGGTG             | CGTTGGATTTGGAGCAGAAGTG            |
| <b>Ahr</b>            | TAGGCTCAGCGTCAGCTACC              | TGCCAGTCTCTGATTTGTGC              |
| <b>Indo</b>           | AGAGCTCGCAGTAGGGAACAG             | CATCACCATGGCGTATGTG               |
| <b>Tjp1 (Zo-1)</b>    | CGCGGAGAGAGACAAGATGT              | CCTGTGAAGCGTCACTGTGT              |

**Supplementary Table 1** Primers list
